# Supplementary material
Source: PubMed Central journal article supplement (PMC2740475)
Supplement: NIHMS125513-supplement-Table_S1.pdf [file NIHMS125513-supplement-Table_S1.pdf]

**Table S1. Dharmacon SMARTpool siRNA target sequences**

| Gene Name                | Gene Symbol | Target Transcript 1   | Target Transcript 2   | Target Transcript 3   | Target Transcript 4   |
|--------------------------|-------------|-----------------------|-----------------------|-----------------------|-----------------------|
| Human $\beta$ 3 integrin | ITGB3       | GAAAGUCCAUCCUGUAUGU   | GAAAUCCGUUCUAAAGUA    | UUACUGCCGUGACGAGAUU   | CGUCUACCUUCACCAUAU    |
| Human $\beta$ 5 integrin | ITGB5       | GCUCGCAGGUCUCAACAUAUU | GGUCUAAAGUGGAGUUGUCUU | GGGAUGAGGUGAUCACAUGUU | GUGCAUUGGUUACAAGUUGUU |
| Human plectin            | PLEC1       | GCACUCACUCCGCGUGACAUU | UCGCAGGGCUGUUGCUGAAUU | GGCAAGACGGUGACCAUUUUU | GAAGAGACACAGAUCGACAUU |
