# Supplementary material
Source: PubMed Central journal article supplement (PMC2740475)

**A**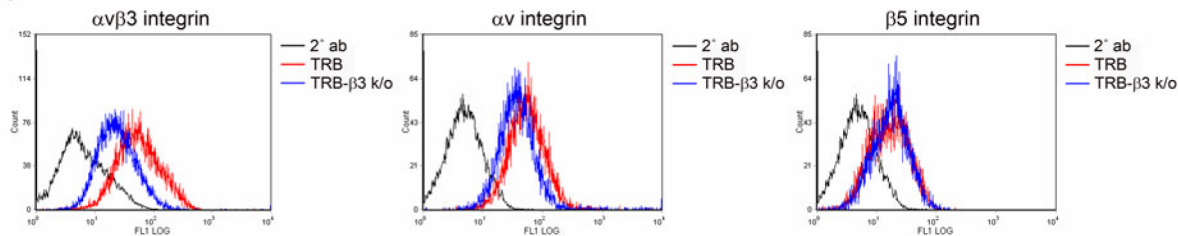**B**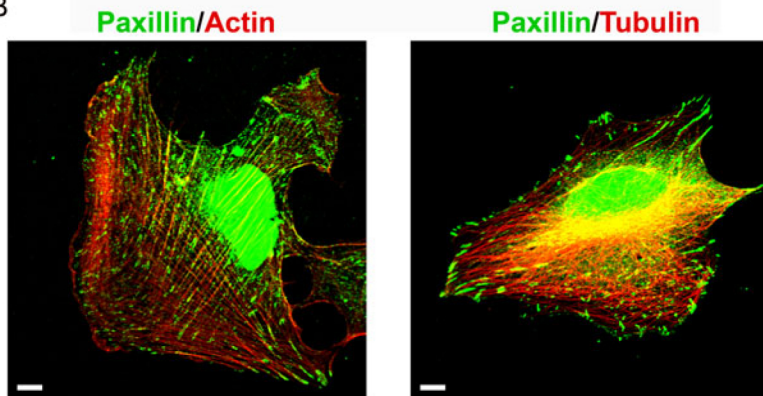**β3 integrin siRNA****C**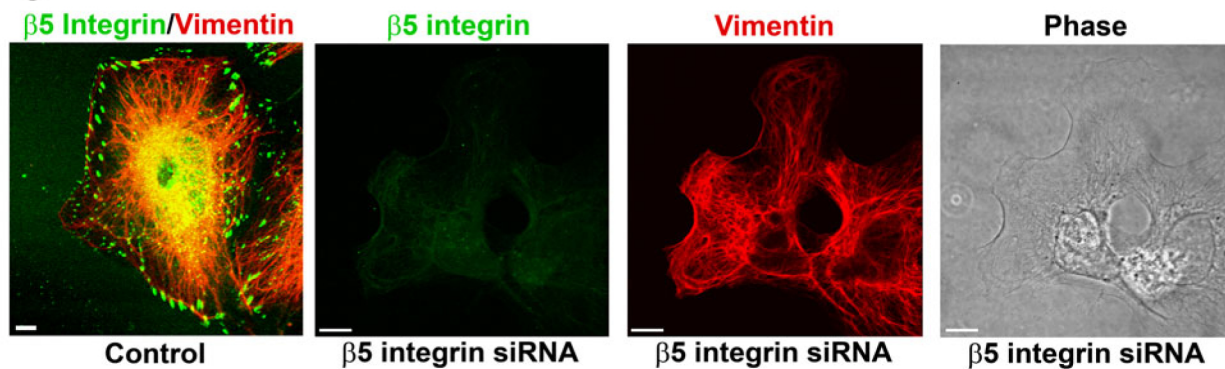

Supplement: NIHMS125513-supplement-Figure_S1.pdf [file NIHMS125513-supplement-Figure_S1.pdf]

Paxillin/Actin

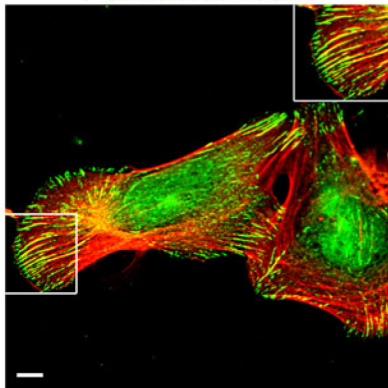

Paxillin/Tubulin

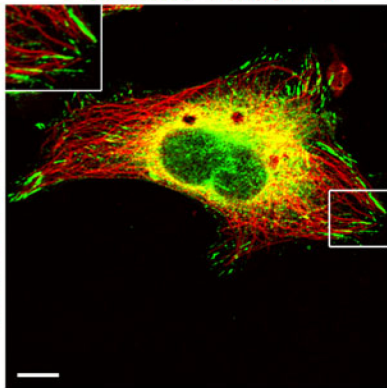

-MnCl<sub>2</sub>

Supplement: NIHMS125513-supplement-Figure_S2.pdf [file NIHMS125513-supplement-Figure_S2.pdf]

Paxillin/Tubulin

Dynein  
shRNA

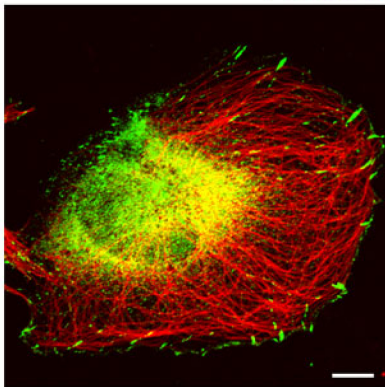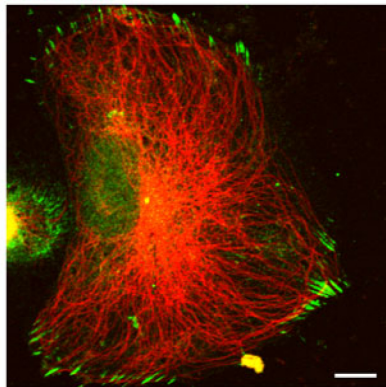

Kinesin  
shRNA

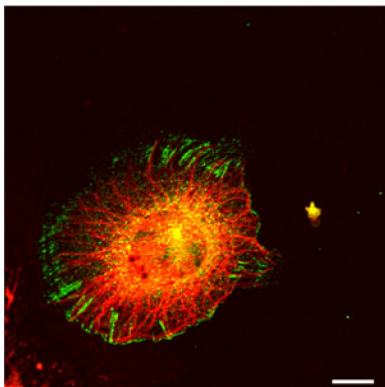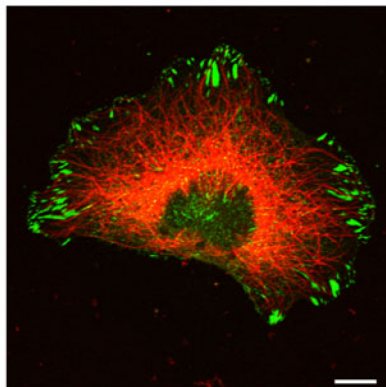

-MnCl<sub>2</sub>

+MnCl<sub>2</sub>

Supplement: NIHMS125513-supplement-Figure_S3.pdf [file NIHMS125513-supplement-Figure_S3.pdf]

**Paxillin/Actin**

**Paxillin/Tubulin**

**Control**

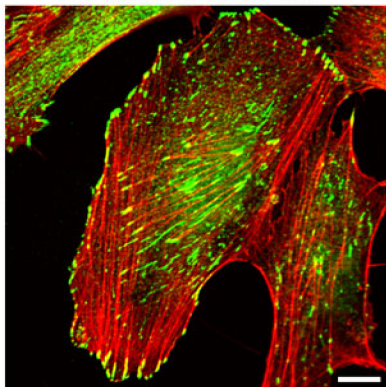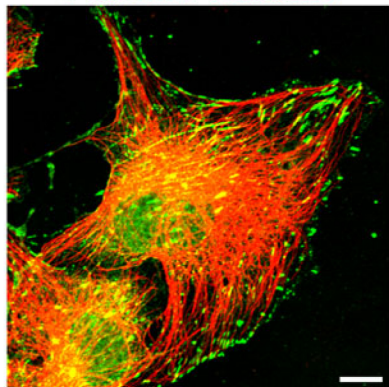

**Plectin  
siRNA**

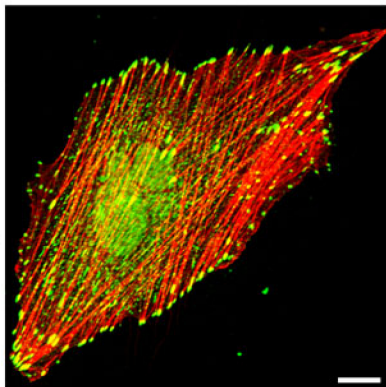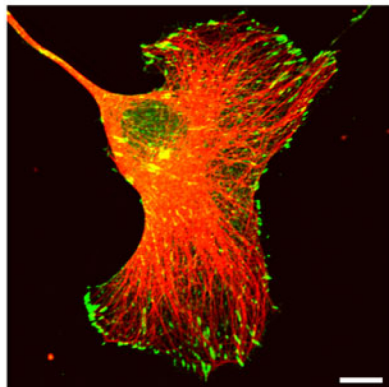

Supplement: NIHMS125513-supplement-Figure_S4.pdf [file NIHMS125513-supplement-Figure_S4.pdf]
